# Supplementary material
Source: HighWire-hosted journal article supplement (https://cmaj.ca/highwire/filestream/59378/field_highwire_adjunct_files/3/150003-res-4-at.pdf)
Supplement: 150003-res-4-at.pdf [file 150003-res-4-at.pdf]

**Appendix 4 (as supplied by the authors): Cochran-Armitage tests for trend by body site**

|                                                 | Stage     | Imaging Modality | Cochran-Armitage test for trend P |
|-------------------------------------------------|-----------|------------------|-----------------------------------|
| <b>PANEL A: Skeletal Imaging</b>                |           |                  |                                   |
| Primary imaging                                 | I         | BONE SCAN        | <0.0001                           |
|                                                 |           | MRI_CT           | <0.0001                           |
| Confirmatory imaging                            | II        | BONE SCAN        | <0.0001                           |
|                                                 |           | MRI_CT           | <0.0001                           |
|                                                 | I         | BONE SCAN        | 0.1189                            |
|                                                 |           | MRI_CT           | <0.0001                           |
| II                                              | BONE SCAN | <0.0001          |                                   |
|                                                 | MRI_CT    | <0.0001          |                                   |
| <b>PANEL B: Thoracic Imaging</b>                |           |                  |                                   |
| Primary imaging                                 | I         | CT               | <0.0001                           |
|                                                 |           | XRAY             | <0.0001                           |
|                                                 | II        | CT               | <0.0001                           |
|                                                 |           | XRAY             | <0.0001                           |
| Confirmatory imaging                            | I         | CT               | <0.0001                           |
|                                                 |           | XRAY             | 0.2059                            |
|                                                 | II        | CT               | <0.0001                           |
|                                                 |           | XRAY             | 0.9969                            |
| <b>PANEL C: Abdominal and/or pelvic imaging</b> |           |                  |                                   |
| Primary imaging                                 | I         | US               | <0.0001                           |
|                                                 |           | MRI_CT           | <0.0001                           |
|                                                 | II        | US               | <0.0001                           |
|                                                 |           | MRI_CT           | <0.0001                           |
| Confirmatory imaging                            | I         | US               | 0.0011                            |
|                                                 |           | MRI_CT           | 0.8039                            |
|                                                 | II        | US               | <0.0001                           |
|                                                 |           | MRI_CT           | 0.0404                            |
